# Supplementary material for: Multigene Phylogenetics Reveals Temporal Diversification of Major African Malaria Vectors
Source: PubMed Central journal article supplement (PMC3976319; doi:10.1371/journal.pone.0093580), 2014-04-04
Supplement: pone.0093580.s002.pdf [file pone.0093580.s002.pdf]

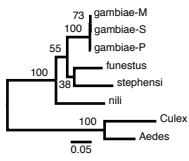

X-AGAP00064

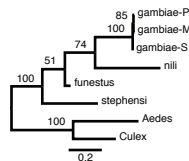

X-AGAP00521

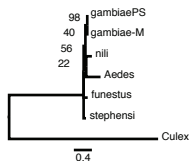

X-AGAP000776

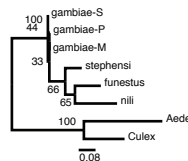

2R-AGAP001287

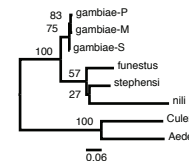

2R-AGAP001700

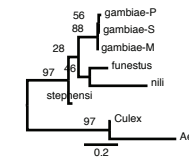

2R-AGAP001760

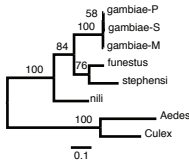

2R-AGAP001762

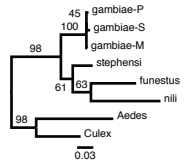

2R-AGAP002019

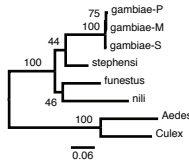

2R-AGAP002252

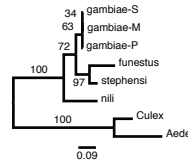

2R-AGAP002424

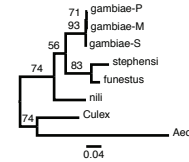

2R-AGAP002790

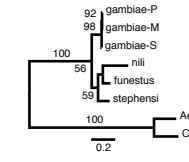

2R-AGAP002933

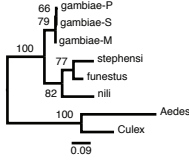

2R-AGAP002935

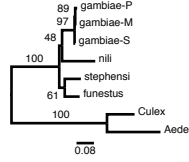

2R-AGAP003043

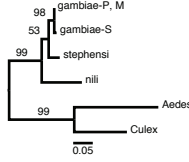

2R-AGAP003327

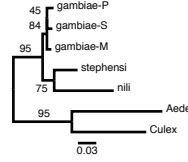

2R-AGAP003328

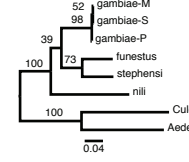

2R-AGAP003397

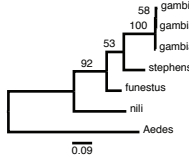

2R-AGAP003584

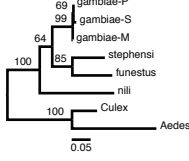

2R-AGAP004028

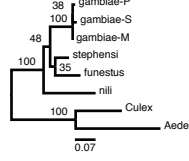

2R-AGAP004199

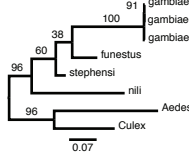

2R-AGAP004486

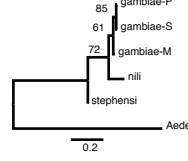

2R-AGAP013533

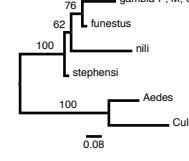

2L-AGAP004699

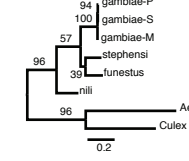

2L-AGAP005014

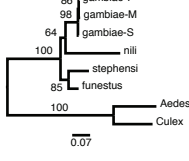

2L-AGAP005279

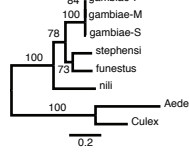

2L-AGAP005542

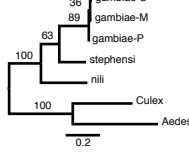

2L-AGAP005778

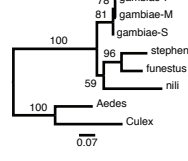

2L-AGAP005851

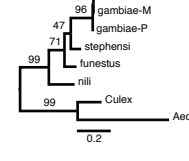

2L-AGAP006209

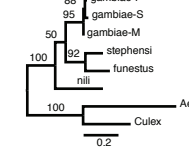

2L-AGAP006531

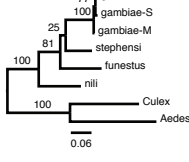

2L-AGAP006783

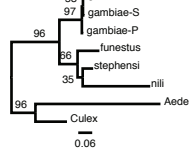

2L-AGAP007068

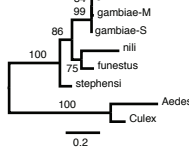

2L-AGAP007504

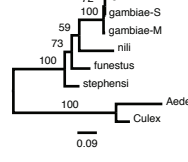

2L-AGAP007069

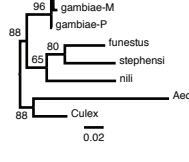

2L-AGAP007131

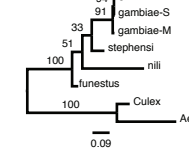

3R-AGAP007903

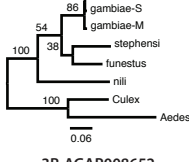

3R-AGAP008652

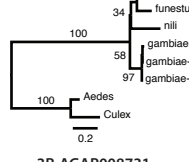

3R-AGAP008731

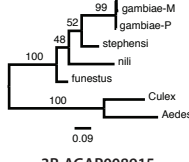

3R-AGAP008915

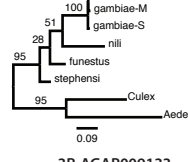

3R-AGAP009133

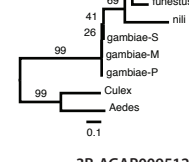

3R-AGAP009512

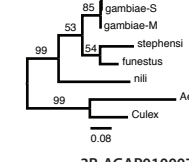

3R-AGAP010007

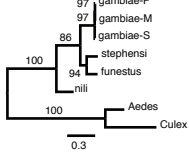

3L-AGAP010267

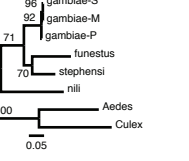

3L-AGAP010567

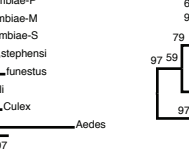

3L-AGAP011099

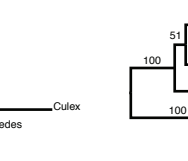

3L-AGAP011357

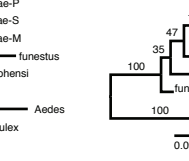

3L-AGAP011526

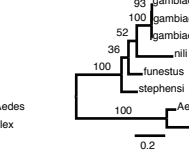

3L-AGAP011765

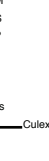

3L-AGAP0012219
